# Supplementary material for: Co-expression of anti-miR319g and miRStv_11 lead to enhanced steviol glycosides content in Stevia rebaudiana
Source: PubMed Central journal article supplement (PMC6591970; doi:10.1186/s12870-019-1871-2), 2019-06-24
Supplement: 12870_2019_1871_MOESM2_ESM.pdf [file 12870_2019_1871_MOESM2_ESM.pdf]

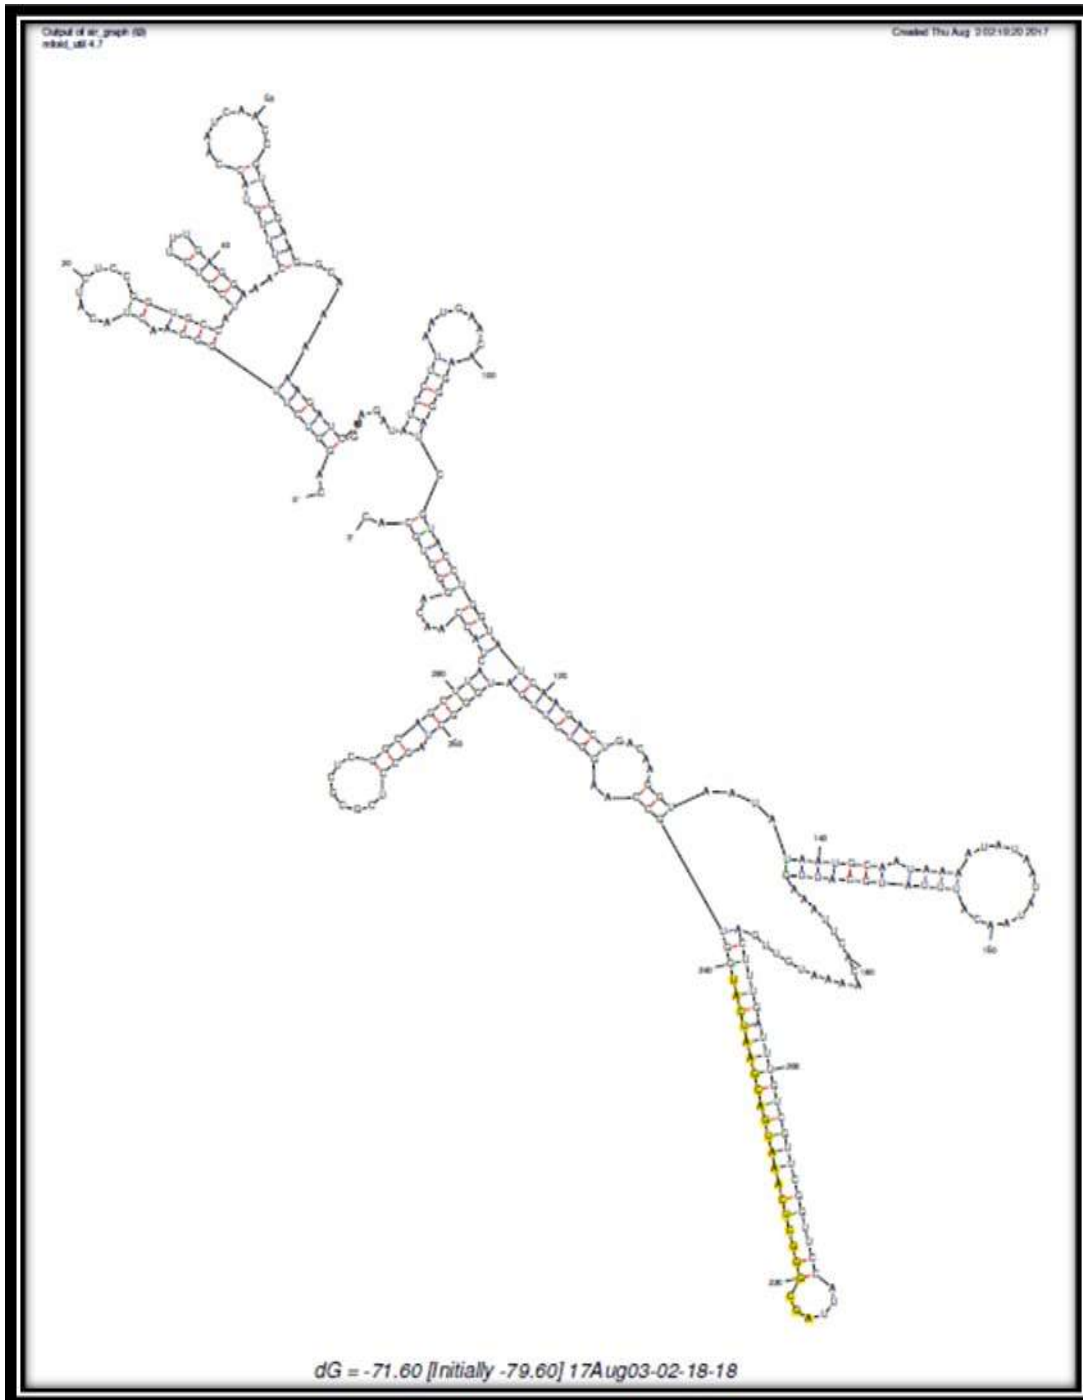

**Additional File 2: Structure of miRStv\_11 obtained from *S. rebaudiana* using mfold.**
