# Supplementary material for: Co-expression of anti-miR319g and miRStv_11 lead to enhanced steviol glycosides content in Stevia rebaudiana
Source: PubMed Central journal article supplement (PMC6591970; doi:10.1186/s12870-019-1871-2), 2019-06-24
Supplement: 12870_2019_1871_MOESM3_ESM.pdf [file 12870_2019_1871_MOESM3_ESM.pdf]

### Additional file 3: Primer sequences and their annealing conditions

| miRNA                                     | Primer Sequence  |                                                        | Annealing conditions |
|-------------------------------------------|------------------|--------------------------------------------------------|----------------------|
| miR319g<br>(Precursor Sequence)           | FP               | AGATCTGAGCTTCTTTCAGCCCACTC                             | 54.3°C,<br>1.30min   |
|                                           | RP               | GGTAACCAAGCAGCTCCCTTCAGTCCAA                           |                      |
| miRStv_11<br>(Precursor Sequence)         | FP               | AGATCTCAGGTCTTGGCAACTACATCTC                           | 54.3°C,<br>1.30min   |
|                                           | RP               | GGTAACCGTGCACCCTGTTGGTAGTAAG                           |                      |
| anti-miR319g<br>(Precursor Sequence)      | FP               | GGTACCGAGCTTCTTTCAGCCCACTC                             | 54.3°C,<br>1.30min   |
|                                           | RP               | AGATCTAAGGAGCTCCCTTCAGTCCAA                            |                      |
| anti-miRStv_11<br>(Precursor Sequence)    | FP               | GGTACCCAGGTCTTGGCAACTACATCTC                           | 54.3°C,<br>1.30min   |
|                                           | RP               | AGATCTGTGCACCCTGTTGGTAGTAAG                            |                      |
| Anti-miRstv_11<br>(Mature miRNA Sequence) | RTP              | GTCGTATCCAGTGCAGGGTCCGAGGTATTCGCACTGGATACGACG<br>GCTCA | 55°C,<br>30sec       |
|                                           | FP               | CGCGAUGACUCGUCAUUU                                     |                      |
| Anti-miR319g<br>(Mature miRNA Sequence)   | RTP              | GTCGTATCCAGTGCAGGGTCCGAGGTATTCGCACTGGATACGACT<br>TGGAC | 55°C,<br>30sec       |
|                                           | FP               | GCGCATGAGCTCCCTTCA                                     |                      |
| URP                                       | GTGCAGGGTCCGAGGT |                                                        |                      |
