# Supplementary material for: Co-expression of anti-miR319g and miRStv_11 lead to enhanced steviol glycosides content in Stevia rebaudiana
Source: PubMed Central journal article supplement (PMC6591970; doi:10.1186/s12870-019-1871-2), 2019-06-24
Supplement: 12870_2019_1871_MOESM4_ESM.pdf [file 12870_2019_1871_MOESM4_ESM.pdf]

**Additional file 4: Atomic level interactions of miRNA and miRNA binding sites. miRStv\_11 bases are shown in three letters and *KAH* gene promoter region bases are depicted in one letter codes.**

| <b>Donor</b> | <b>Acceptor</b> | <b>Donor Acceptor Distance</b> |
|--------------|-----------------|--------------------------------|
| C 3.B N4     | GUA 13.C N3     | 3.3                            |
| A 5.B N6     | ADE 14.C OP1    | 2.2                            |
| A 6.B N6     | ADE 14.C N7     | 2.9                            |
| C 8.B N4     | GUA 3.C O6      | 2.9                            |
| C 8.B N4     | URA 16.C O4     | 3.5                            |
| C 9.B N4     | GUA 2.C O6      | 2.6                            |
| C 10.B N4    | GUA 1.C O6      | 3.4                            |
| C 10.B N4    | URA 19.C O4     | 3.6                            |
| ADE 14.C N6  | A 6.B N7        | 2.6                            |
| ADE 14.C N6  | A 6.B O2P       | 3.3                            |
| CYT 17.C N4  | G 2.A O6        | 2.9                            |
| CYT 17.C N4  | G 3.A O6        | 3.6                            |
| ADE 5B.C N6  | A 6.B O5'       | 2.5                            |
