# Supplementary material for: Co-expression of anti-miR319g and miRStv_11 lead to enhanced steviol glycosides content in Stevia rebaudiana
Source: PubMed Central journal article supplement (PMC6591970; doi:10.1186/s12870-019-1871-2), 2019-06-24
Supplement: 12870_2019_1871_MOESM5_ESM.pdf [file 12870_2019_1871_MOESM5_ESM.pdf]

**Additional file 5: Sequence of miR319g and miRStv\_11 obtained from *Stevia rebaudiana* and their alignment with sequence of miR319g *Populus trichocarpa* and stevia EST, respectively.**

| miRNA-ID  | Sequence                                                                                                                                                                                                                                                                                                                       |
|-----------|--------------------------------------------------------------------------------------------------------------------------------------------------------------------------------------------------------------------------------------------------------------------------------------------------------------------------------|
| miR319g   | GAGCTTCTTTCAGCCCACTCATGGAGGTGATTAGGGAATTGAATTAGCTGCCGAC<br>TCATTCATTCAAACCACTCAGTAGAAAATGAGGCGATGTTCTTTGAGCTACTTTGA<br>TTGAGTGAATGATGCGGGAGACAGTTTTCACTCCTTGCTAATCTATGCTTGGACTG<br>AAGGGAGCTCCTTAA                                                                                                                             |
| miRStv_11 | CAGGTCTTGGCAACTACATCTCCGGTGCCATCCTCTTTGAGGAACTTTGTACCAA<br>TCAACCGTCGAAGGCAAAAAGATCGTAGATATCCTTAATGAACAAGGGATCGTAC<br>CTGGTATCAAGACTGACAAGGTAATATAATGCAATAAAAATAATATAACATTTAT<br>GCATTGAAATTCACAAAATGTTGACTTTGATTTGTCGTTCCGTTCCATTGGCGGGC<br>TCAAATGACGAGTCA TGGTGCCAAGGTCTTGATGGGCTAGCCTCGCGCTCGGCA<br>GCTTACTACCAACAGGGTGCAC |

**1. Alignment of sequence of miR319g obtained from *S. rebaudiana* with sequence of miR319g obtained from *Populus trichocarpa*.**

```

miR319g-Stevia      -----GAGCTTCTTTCAGCCCACTCATGGAGGTGATTAGGGAATTGAATTAG
miR319g-ptc        TAATCGTGGGAGAGAGCTTCTTTCAGCCCACTCGTGGATAGGACAAAGGGTTGAACTAG
                    ***** . **** . ** :*.**..***** ***

miR319g-Stevia      CTGCCGACTCATTCATTCAAACCACTCAGTAGAAAATG-----ATTCTTTGAGCTA
miR319g-ptc        CTGCCGACTCATTCATTCAAGCACTAGTAGAAAAAAGGCGAACGGTGTTCCTTTGCTA
                    *****.*.. : :. *.***:*          .** ** :****

miR319g-Stevia      CTTTGATTGAGTGAATGATGCGGGAGACAGTTTTCACTCCTTG-CTAATCTATGCTTGA
miR319g-ptc        CTGTGATTGTGTAATGATGCGGGAGATAATTTCCATCCTCTCCTTTCTGTGCTTGA
                    ** *****:***** *..*****..***** **: :****.*****

miR319g-Stevia      CTGAAGGGAGCTCCTTAA-----
miR319g-ptc        CTGAAGGGAGCTCCTTCTTCT
                    *****..

```

**2. Alignment of sequence of miRStv\_11 obtained from *S. rebaudiana* with sequence of stevia EST.**

```
miRStv_11      CAGGTCTTGGCAACTACATCTCCGGTGCCATCCTCTTTGAGGAACTTTGTACCAATCAA
Stevia-EST     CAGGTCTTGGCAACTACATCTCCGGTGCCATCCTCTTTGAGGAACTTTGTACCAATCAA
*****

miRStv_11      CCGTCGAAGGCAAAAAGATCGTAGATATCCTTAATGAACAAGGGATCGTACCTGGTATCA
Stevia-EST     CTGTCGAAGGCAAAAAGATCGTAGATATCCTTAATGAACAAGGGATCGTACCTGGTATC
* *****

miRStv_11      AGACTGACAAGGTAATATAATGCAATAAAATATAATATAACATTTATGCATTGAAATTCA
Stevia-EST     AGACTGACAAGGGTT-----
*****

miRStv_11      CAAAATGTTGACTTTGATTTGTCGTTTCGTTCCATTGGCGGGCTCAAATGACGAGTCATG
Stevia-EST     -----TGGTTCCATTGGCGGGCTCAAATGACGAGTCATG
*****

miRStv_11      GTGCCAAGGTCTTGATGGGCTAGCCTCGCGCTCGGCAGCTTACTACCAACAGGGTGCAC
Stevia-EST     GTGCCAAGGTCTTGATGGGCTAGCCTCGCGCTCGGCAGCTTACTACCAACAGGGTGCAC
*****
```
